# Supplementary material for: SNF1-Related Protein Kinase 1 Activity Represses the Canonical Translational Machinery
Source: MDPI journal article supplement (doi:10.3390/plants11101359), 2022-05-20
Supplement: s1 [file s1]

| Gene           | Primer sequence               | Purpose |
|----------------|-------------------------------|---------|
| <i>GFP</i>     | F: TTCTTCAAGGACGACGGCAA       | qRT-PCR |
|                | R: TCGATGTTGTGGCGGATCTT       | qRT-PCR |
| <i>SPYNE</i>   | F: GTGACCACCTTCGGCTACGG       | qRT-PCR |
|                | R: CCCTTCAGCTCGATGCGGTT       | qRT-PCR |
| <i>AtACTIN</i> | F: ATGTGGATCTCCAAGGCCGA       | qRT-PCR |
|                | R: ACACACAAGTGCATCATAGAAACGAA | qRT-PCR |
| <i>DAP</i>     | F: CAGACCGCGGCCTAATAATG       | qRT-PCR |
|                | R: CAGTGACAATTGACCGAATTGC     | qRT-PCR |

**Table S1.** Sequence of primers used in this study
